# Supplementary material
Source: PubMed Central journal article supplement (PMC5544115)
Supplement: NIHMS72292-supplement-Supplementary_data.pdf [file NIHMS72292-supplement-Supplementary_data.pdf]

**Supplementary data 1**

**Foot Osteoarthritis MRI Score Sheet**

MRI ID \_\_\_\_\_

Sequences \_\_\_\_\_

| Forefoot                            |                          | Metatarsophalangeal Joint Scores |                 |     |     |     |
|-------------------------------------|--------------------------|----------------------------------|-----------------|-----|-----|-----|
| Features                            |                          | 1st                              | 2 <sup>nd</sup> | 3rd | 4th | 5th |
| Joint space narrowing (score 0-3)   |                          |                                  |                 |     |     |     |
| Osteophytosis (score 0-3)           |                          |                                  |                 |     |     |     |
| Effusion-synovitis (score 0-1)      |                          |                                  |                 |     |     |     |
| Subchondral cysts (score 0-1)       |                          |                                  |                 |     |     |     |
| Bone marrow lesion (score 0-3)      | Proximal Metatarsal head |                                  |                 |     |     |     |
|                                     | Distal Phalanx base      |                                  |                 |     |     |     |
| Bone erosion (Score 0-3)            | Proximal Metatarsal head |                                  |                 |     |     |     |
|                                     | Distal Phalanx base      |                                  |                 |     |     |     |
| Comments : FOV / positioning issues |                          |                                  |                 |     |     |     |

|                                      | Forefoot       |  | Metatarsal Bone Scores |     |     |     |     |
|-------------------------------------------------------------------------------------------------------------------------|----------------|--|------------------------|-----|-----|-----|-----|
|                                                                                                                         | Features       |  | 1st                    | 2nd | 3rd | 4th | 5th |
| <b>Bone marrow lesion</b><br>(score 0-3)<br>Illustration of bone shaft divided into proximal central and distal regions | Proximal Shaft |  |                        |     |     |     |     |
|                                                                                                                         | Central Shaft  |  |                        |     |     |     |     |
|                                                                                                                         | Distal Shaft   |  |                        |     |     |     |     |

Pictorial guide illustrating the scoring of erosion, sectioning the bone into thirds:

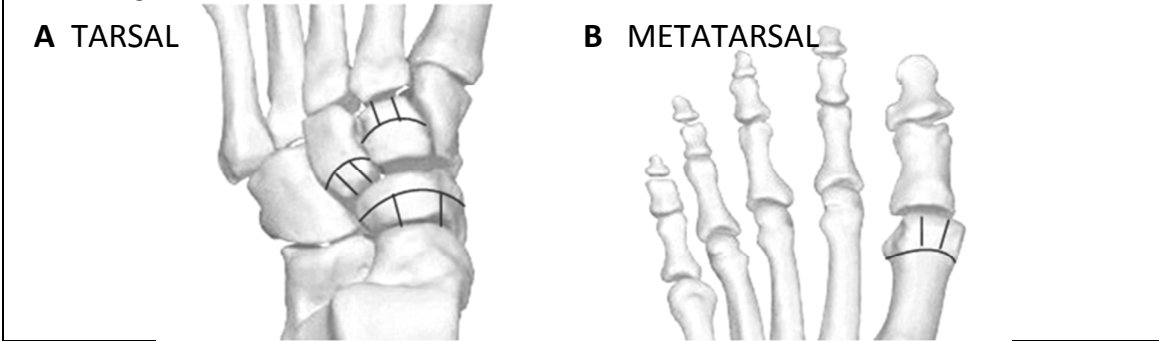

| Midfoot                                                        | Tarsometatarsal Joint Scores |     |     |     |     |
|----------------------------------------------------------------|------------------------------|-----|-----|-----|-----|
|                                                                | 1st                          | 2nd | 3rd | 4th | 5th |
| <b>Features</b>                                                |                              |     |     |     |     |
| <b>Joint space narrowing</b><br>(score 0-3)                    |                              |     |     |     |     |
| <b>Osteophytosis</b> (score 0-3)                               |                              |     |     |     |     |
| <b>Effusion-synovitis</b><br>(score 0-1)                       |                              |     |     |     |     |
| <b>Subchondral cysts</b><br>(score 0-1)                        |                              |     |     |     |     |
| <b>Bone marrow lesion Distal - base metatarsal</b> (score 0-3) |                              |     |     |     |     |
| <b>Bone erosion Distal - base metatarsal</b> (score 0-3)       |                              |     |     |     |     |
| <b>Ligament</b> (score 0-1 & location)                         |                              |     |     |     |     |

| Midfoot                                  | Tarsal Bone Scores |           |           |                  |                        |                   |        |
|------------------------------------------|--------------------|-----------|-----------|------------------|------------------------|-------------------|--------|
|                                          | Talus              | Calcaneus | Navicular | Medial cuneiform | Intermediate cuneiform | Lateral cuneiform | Cuboid |
| <b>Bone erosion</b><br>(score 0-3)       |                    |           |           |                  |                        |                   |        |
| <b>Bone marrow lesion</b><br>(score 0-3) |                    |           |           |                  |                        |                   |        |
| <b>Comments</b><br>(e.g. ossicle)        |                    |           |           |                  |                        |                   |        |

| <b>Midfoot to Hindfoot</b>                  | <b>Tarsal and Subtalar Joint Scores</b> |                             |                              |                                                  |                |                |
|---------------------------------------------|-----------------------------------------|-----------------------------|------------------------------|--------------------------------------------------|----------------|----------------|
| <b>Features</b>                             | <b>Talo-calcaneal joint</b>             | <b>Talo-navicular joint</b> | <b>Calcaneo-cuboid joint</b> | <b>Intertarsal - naviculo - cuneiform joints</b> |                |                |
|                                             |                                         |                             |                              | <b>Medial</b>                                    | <b>Interm.</b> | <b>Lateral</b> |
| <b>Joint space narrowing</b><br>(score 0-3) |                                         |                             |                              |                                                  |                |                |
| <b>Osteophytosis</b><br>(score 0-3)         |                                         |                             |                              |                                                  |                |                |
| <b>Effusion-synovitis</b><br>(score 0-1)    |                                         |                             |                              |                                                  |                |                |
| <b>Subchondral cysts</b> (score 0-1)        |                                         |                             |                              |                                                  |                |                |
| <b>Ligament</b><br>(score 0-1 & location)   |                                         |                             |                              |                                                  |                |                |

| <b>Soft Tissue Tenosynovitis</b> | <b>Scores</b> |
|----------------------------------|---------------|
| <b>Feature (score 0-3)</b>       |               |
| <b>Tibialis Anterior</b>         |               |
| <b>Extensor Hallucis Longus</b>  |               |
| <b>Extensor Digitorum Longus</b> |               |
| <b>Peroneus Brevis</b>           |               |
| <b>Peroneus Longus</b>           |               |
| <b>Tibialis Posterior</b>        |               |
| <b>Flexor Digitorum Longus</b>   |               |
| <b>Flexor Hallucis Longus</b>    |               |

| Enthesopathy Scores (bone marrow lesion located at enthesis of tendon) |                                                                            |                                                                |                                                                                    |                                                                                 |                                                                   |                                                                  |                                                        |                                                       |                                               |
|------------------------------------------------------------------------|----------------------------------------------------------------------------|----------------------------------------------------------------|------------------------------------------------------------------------------------|---------------------------------------------------------------------------------|-------------------------------------------------------------------|------------------------------------------------------------------|--------------------------------------------------------|-------------------------------------------------------|-----------------------------------------------|
| Feature                                                                | Location                                                                   |                                                                |                                                                                    |                                                                                 |                                                                   |                                                                  |                                                        |                                                       |                                               |
| <b>Bone location</b>                                                   | <b>1<sup>st</sup> Metatarsal</b><br><i>Anterior<br/>medial<br/>plantar</i> | <b>1<sup>st</sup> Metatarsal</b><br><i>Plantar<br/>lateral</i> | <b>2<sup>nd</sup>, 3<sup>rd</sup>, 4<sup>th</sup> Metatarsal</b><br><i>plantar</i> | <b>Base 5<sup>th</sup> Metatarsal</b><br><i>Proximal<br/>dorsal<br/>lateral</i> | <b>Medial cuneiform</b><br><i>Anterior<br/>medial<br/>plantar</i> | <b>Medial cuneiform</b><br><i>Plantar<br/>distal<br/>lateral</i> | <b>Medial cuneiform</b><br><i>Plantar<br/>proximal</i> | <b>Lateral cuneiform</b><br><i>Plantar<br/>medial</i> | <b>Navicular</b><br><i>Plantar<br/>medial</i> |
| <b>Tendon</b>                                                          | <b>Tibialis Anterior</b>                                                   | <b>Peroneus Longus</b>                                         | <b>Tibialis Posterior</b>                                                          | <b>Peroneus Brevis</b>                                                          | <b>Tibialis Anterior</b>                                          | <b>Peroneus Longus</b>                                           | <b>Tibialis Posterior</b>                              | <b>Tibialis Posterior</b>                             | <b>Tibialis Posterior</b>                     |
| <b>Bone signal</b><br>(score 0-1)                                      |                                                                            |                                                                |                                                                                    |                                                                                 |                                                                   |                                                                  |                                                        |                                                       |                                               |

| Sub-tendon bone marrow lesion scores |                                                  |                          |                           |                          |                        |
|--------------------------------------|--------------------------------------------------|--------------------------|---------------------------|--------------------------|------------------------|
| Feature                              | Location of sub-tendon at bone and tendon groove |                          |                           |                          |                        |
| <b>Bone location</b>                 | <b>Medial Calcaneus</b>                          | <b>Lateral Calcaneus</b> | <b>Navicular</b>          | <b>Medial cuneiform</b>  | <b>Cuboid</b>          |
| <b>Tendon</b>                        | <b>Tibialis Posterior</b>                        | <b>Peroneus Longus</b>   | <b>Tibialis Posterior</b> | <b>Tibialis Anterior</b> | <b>Peroneus Longus</b> |
| <b>Bone signal</b><br>(score 0-1)    |                                                  |                          |                           |                          |                        |

**Supplementary data 2.** Supplementary Tables S1 to S6. Intra-rater reproducibility results per joint, bone and soft tissue location.

**Table S1:** Intra-rater repeatability of scoring joints for joint space narrowing (JSN), osteophytes, effusion-synovitis and cysts and using suggested cut-points for clinically relevant criteria for JSN and osteophytes (grade  $\geq 2$ ).

| Joint (n=15) | Statistic | JSN 0-3       | JSN $\geq 2$  | Osteophytes 0-3 | Osteophytes $\geq 2$ | Effusion-synovitis 0-1 | Cysts 0-1     |
|--------------|-----------|---------------|---------------|-----------------|----------------------|------------------------|---------------|
| MTPJ1        | PEA       | 93% (13/14)   | 93% (13/14)   | 93% (13/14)     | 100% (14/14)         | 86% (12/14)            | 71% (10/14)   |
|              | ICC       | 0.90          | 0.00          | 0.90            | 1.00                 | 0.07                   | 0.41          |
| MTPJ2        | PEA       | 100%          | 100% (13/13)  | 92% (12/13)     | 100% (13/13)         | 85% (11/13)            | 92% (12/13)   |
|              | ICC       | 1             | 1             | 0.88            | 1                    | 0.43                   | 0.00          |
| MTPJ3        | PEA       | 100% (13/13)* | 100% (13/13)* | 100% (13/13)*   | 100% (13/13)*        | 69% (9/13)             | 100% (13/13)* |
|              | ICC       | -             | -             | -               | -                    | 0.31                   | -             |
| MTPJ4        | PEA       | 100% (14/14)* | 100% (14/14)* | 100% (14/14)*   | 100% (14/14)*        | 50% (7/14)             | 100% (14/14)* |
|              | ICC       | -             | -             | -               | -                    | Negative               | -             |
| MTPJ5        | PEA       | 100% (14/14)* | 100% (14/14)* | 100% (14/14)*   | 100% (14/14)*        | 71% (10/14)            | 100% (14/14)  |
|              | ICC       | -             | -             | -               | -                    | 0.19                   | 1.00          |
| TMTJ1        | PEA       | 93%           | 100%*         | 84%             | 93%                  | 100%                   | 100%          |
|              | ICC       | 0.77          | -             | 0.83            | 0.65                 | 1                      | 1             |
| TMTJ2        | PEA       | 80%           | 100%          | 93%             | 100%                 | 87%                    | 100%          |
|              | ICC       | 0.91          | 1             | 0.95            | 1                    | 0.61                   | 1             |

|                            |     |       |       |      |       |          |       |
|----------------------------|-----|-------|-------|------|-------|----------|-------|
| TMTJ3                      | PEA | 93%   | 100%* | 80%  | 93%   | 67%      | 100%  |
|                            | ICC | 0.77  | -     | 0.70 | 0.00  | 0.36     | 1     |
| TMTJ4                      | PEA | 93%   | 100%* | 87%  | 93%   | 67%      | 100%  |
|                            | ICC | 0.65  | -     | 0.80 | 0.00  | Negative | 1     |
| TMTJ5                      | PEA | 100%* | 100%* | 100% | 100%* | 87%      | 100%* |
|                            | ICC | -     | -     | 1    | -     | 0.46     | -     |
| Ankle                      | PEA | 87%   | 100%  | 93%  | 100%* | 93%      | 100%  |
|                            | ICC | 0.87  | 1     | 0.77 | -     | 0.77     | 1     |
| Subtalar                   | PEA | 100%  | 100%* | 93%  | 100%* | 87%      | 100%  |
|                            | ICC | 1     | -     | 0.00 | -     | 0.00     | 1     |
| Talo-navicular             | PEA | 100%  | 100%* | 93%  | 93%   | 87%      | 93%   |
|                            | ICC | 1     | -     | 0.94 | 0.87  | Negative | 0.77  |
| Calc-cuboid                | PEA | 100%  | 100%* | 93%  | 100%  | 80%      | 100%  |
|                            | ICC | 1     | -     | 0.95 | 1     | 0.46     | 1     |
| Nav-medial-cuneiform       | PEA | 93%   | 100%* | 93%  | 100%  | 80%      | 100%  |
|                            | ICC | 0.77  | -     | 0.92 | 1     | 0.56     | 1     |
| Nav-intermediate-cuneiform | PEA | 100%  | 100%* | 87%  | 100%  | 93%      | 100%  |
|                            | ICC | 1     | -     | 0.83 | 1     | 0.87     | 1     |

|                       |                |                |                |                 |               |                 |               |
|-----------------------|----------------|----------------|----------------|-----------------|---------------|-----------------|---------------|
| Nav-lateral-cuneiform | PEA            | 100%           | 100%*          | 100%            | 100%*         | 93%             | 100%          |
|                       | ICC            | 1              | -              | 1               | -             | 0.87            | 1             |
| <b>All joints</b>     | PEA            | 96% (238/248)  | >99% (247/248) | 93% (231/248)   | 98% (244/248) | 81.5% (202/248) | 98% (242/248) |
|                       | % ± 1 category | 100% (248/248) | n/a            | 100% (248/248)  | n/a           | n/a             | n/a           |
|                       | PPA score=0    | 98% (422/429)  | >99% (480/481) | 96% (322/335)   | 99% (448/452) | 62% (74/120)    | 99% (432/438) |
|                       | PPA score=1    | 85% (44/52)    | 93% (14/15)    | 86% (100/117)   | 91% (40/44)   | 88% (330/376)   | 90% (52/58)   |
|                       | PPA score=2    | 77% (10/13)    | n/a            | 91% (40/44)     | n/a           | n/a             | n/a           |
|                       | PPA score=3    | 0% (0/2)       | n/a            | - (none scored) | n/a           | n/a             | n/a           |
|                       | ICC            | 0.90           | 0.89           | 0.90            | 0.90          | 0.46            | 0.87          |

Metatarsophalangeal joint=MTPJ; Tarsometatarsal joint=TMTJ; Joint space narrowing=JSN; ICC=Intraclass correlation coefficient from generalizability theory; PEA=Percent exact agreement; PPA=Chamberlain’s percent positive agreement i.e. the proportion of the total number of ratings made in the two reads which were in agreement. \*All joints scored 0 according to both reads.

**Table S2:** Intra-rater reproducibility of scoring bones for erosion and bone marrow lesion (BML) and using suggested cut-points for clinically relevant criteria greater than 0 (grades  $\geq 1$  ).

| <b>Bone (n=15)</b>    | <b>Statistic</b> | <b>Erosion 0-3</b> | <b>Erosion <math>\geq 1</math></b> | <b>BML 0-3</b> | <b>BML <math>\geq 1</math></b> |
|-----------------------|------------------|--------------------|------------------------------------|----------------|--------------------------------|
| Distal metatarsal 1   | PEA              | 86% (12/14)        | 86% (12/14)                        | 93% (13/14)    | 93% (13/14)                    |
|                       | ICC              | 0.46               | 0.46                               | 0.85           | 0.85                           |
| Distal metatarsal 2   | PEA              | 93% (13/14)        | 93% (13/14)                        | 100% (13/13)   | 100% (13/13)                   |
|                       | ICC              | 0.00               | 0.00                               | 1              | 1                              |
| Distal metatarsal 3   | PEA              | 100% (14/14)*      | 100% (14/14)*                      | 100% (13/13)*  | 100% (13/13)*                  |
|                       | ICC              | -                  | -                                  | -              | -                              |
| Distal metatarsal 4   | PEA              | 100% (14/14)*      | 100% (14/14)*                      | 100% (14/14)*  | 100% (14/14)*                  |
|                       | ICC              | -                  | -                                  | -              | -                              |
| Distal metatarsal 5   | PEA              | 100% (14/14)*      | 100% (14/14)*                      | 100% (14/14)*  | 100% (14/14)*                  |
|                       | ICC              | -                  | -                                  | -              | -                              |
| Proximal metatarsal 1 | PEA              | 100%               | 100%                               | 80.0%          | 87%                            |
|                       | ICC              | 1                  | 1                                  | 0.70           | 0.74                           |
| Proximal metatarsal 2 | PEA              | 93%                | 93%                                | 73%            | 87%                            |
|                       | ICC              | 0.91               | 0.83                               | 0.85           | 0.75                           |
| Proximal metatarsal 3 | PEA              | 93%                | 93%                                | 73%            | 80%                            |
|                       | ICC              | 0.00               | 0.00                               | 0.62           | 0.59                           |
| Proximal metatarsal 4 | PEA              | 100%*              | 100%*                              | 100%           | 100%                           |



|                        |                |               |               |                |               |
|------------------------|----------------|---------------|---------------|----------------|---------------|
|                        | ICC            | -             | -             | 1              | 1             |
| Proximal metatarsal 5  | PEA            | 100%*         | 100%*         | 100%*          | 100%*         |
|                        | ICC            | -             | -             | -              | -             |
| Talus                  | PEA            | 93%           | 93%           | 93%            | 100%          |
|                        | ICC            | 0.65          | 0.65          | 0.87           | 1             |
| Calcaneus              | PEA            | 100%*         | 100%*         | 100%           | 100%          |
|                        | ICC            | -             | -             | 1              | 1             |
| Navicular              | PEA            | 100%*         | 100%*         | 100%           | 100%          |
|                        | ICC            | -             | -             | 1              | 1             |
| Medial cuneiform       | PEA            | 100%*         | 100%*         | 93%            | 93%           |
|                        | ICC            | -             | -             | 0.95           | 0.88          |
| Intermediate cuneiform | PEA            | 87%           | 87%           | 80%            | 87%           |
|                        | ICC            | 0.44          | 0.44          | 0.84           | 0.74          |
| Lateral cuneiform      | PEA            | 100%*         | 100%*         | 87%            | 93%           |
|                        | ICC            | -             | -             | 0.79           | 0.87          |
| Cuboid                 | PEA            | 100%*         | 100%*         | 73%            | 73%           |
|                        | ICC            | -             | -             | 0.49           | 0.49          |
| <b>All bones</b>       | PEA            | 97% (242/250) | 97% (242/250) | 91% (225/248)  | 94% (232/248) |
|                        | % ± 1 category | 100% (250)    | n/a           | >99% (247/248) | n/a           |

|  |             |                 |               |               |               |
|--|-------------|-----------------|---------------|---------------|---------------|
|  | PPA score=0 | 98% (470/478)   | 98% (470/478) | 95% (338/354) | 95% (338/354) |
|  | PPA score=1 | 60% (12/20)     | 64% (14/22)   | 79% (88/111)  | 89% (126/142) |
|  | PPA score=2 | 100% (2/2)      | n/a           | 79% (22/28)   | n/a           |
|  | PPA score=3 | - (none scored) | n/a           | 67% (2/3)     | n/a           |
|  | ICC         | 0.66            | 0.57          | 0.83          | 0.79          |

Metatarsophalangeal joint=MTPJ; Tarsometatarsal joint=TMTJ; Joint space narrowing=JSN; Bone marrow lesion=BML; ICC=Intraclass correlation coefficient from generalizability theory; PEA=Percent exact agreement; PPA=Chamberlain's percent positive agreement i.e. the proportion of the total number of ratings made in the two reads which were in agreement. \*All bones scored 0 according to both reads.

**Table S3:** Intra-rater reproducibility of scoring of tenosynovitis per tendon per grade and with suggested cut-points for clinically relevant criteria  $\geq 2$ .

| <b>Tendon (n=15)</b>      | <b>Statistic</b> | <b>Tenosynovitis 0-3</b> | <b>Tenosynovitis <math>\geq 2</math></b> |
|---------------------------|------------------|--------------------------|------------------------------------------|
| Tibialis anterior         | PEA              | 73%                      | 100%*                                    |
|                           | ICC              | 0.43                     | -                                        |
| Extensor hallucis longus  | PEA              | 100%*                    | 100%*                                    |
|                           | ICC              | -                        | -                                        |
| Extensor digitorum longus | PEA              | 87%                      | 93%                                      |
|                           | ICC              | 0.65                     | 0.00                                     |
| Peroneus brevis           | PEA              | 93%                      | 100%*                                    |
|                           | ICC              | 0.83                     | -                                        |
| Peroneus longus           | PEA              | 93%                      | 100%                                     |
|                           | ICC              | 0.91                     | 1                                        |
| Tibialis posterior        | PEA              | 80%                      | 93%                                      |
|                           | ICC              | 0.67                     | 0.65                                     |
| Flexor hallucis longus    | PEA              | 100%                     | 100%                                     |
|                           | ICC              | 1                        | 1                                        |
| Flexor digitorum longus   | PEA              | 80%                      | 100%*                                    |
|                           | ICC              | 0.46                     | -                                        |
| <b>All tendons</b>        | PEA              | 88% (106/120)            | 98% (118/120)                            |

|  |                |                 |                |
|--|----------------|-----------------|----------------|
|  | % ± 1 category | 100% (120/120)  | 100% (120/120) |
|  | PPA score=0    | 92% (134/146)   | 99% (226/228)  |
|  | PPA score=1    | 83% (68/82)     | 83% (10/12)    |
|  | PPA score=2    | 83% (10/12)     | n/a            |
|  | PPA score=3    | - (none scored) | n/a            |
|  | ICC            | 0.83            | 0.82           |

ICC=Intraclass correlation coefficient from generalizability theory; PEA=Percent exact agreement; PPA=Chamberlain's percent positive agreement i.e. the proportion of the total number of ratings made in the two reads which were in agreement. \*All tendons scored 0 according to both reads.

**Table S4:** Intra-rater reproducibility of scoring presence of bone lesion at five sub-tendon bone marrow lesion (BML) locations.

| Site (n=15)                          | Statistic   | Sub Tendon BML 0-1 |
|--------------------------------------|-------------|--------------------|
| Medial calcaneal: tibialis posterior | PEA         | 100%*              |
|                                      | ICC         | -                  |
| Lateral calcaneal: peroneus longus   | PEA         | 100%               |
|                                      | ICC         | 1                  |
| Navicular: tibialis posterior        | PEA         | 93%                |
|                                      | ICC         | 0.00               |
| Medial cuneiform: tibialis anterior  | PEA         | 87%                |
|                                      | ICC         | 0.46               |
| Cuboid: peroneus longus              | PEA         | 73%                |
|                                      | ICC         | 0.49               |
| <b>All sites</b>                     | PEA         | 91% (68/75)        |
|                                      | PPA score=0 | 94% (120/127)      |
|                                      | PPA score=1 | 70% (16/23)        |
|                                      | ICC         | 0.60               |

Bone marrow lesion=BML; ICC=Intraclass correlation coefficient from generalizability theory; PEA=Percent exact agreement; PPA=Chamberlain’s percent positive agreement i.e. the proportion of the total number of ratings made in the two reads which were in agreement. \*All bones scored 0 according to both reads.

**Table S5:** Intra-rater reproducibility of scoring presence of bone marrow lesion (BML) associated with tendon entheses.

| Site (n=15)                                                                                  | Statistic | Enthesis BML 0-1 |
|----------------------------------------------------------------------------------------------|-----------|------------------|
| 1 <sup>st</sup> metatarsal: plantar medial, tibialis anterior                                | PEA       | 100%             |
|                                                                                              | ICC       | 1                |
| 1 <sup>st</sup> metatarsal: plantar lateral, peroneal longus                                 | PEA       | 80%              |
|                                                                                              | ICC       | 0.46             |
| 2 <sup>nd</sup> , 3 <sup>rd</sup> or 4 <sup>th</sup> metatarsal: plantar, tibialis posterior | PEA       | 100%*            |
|                                                                                              | ICC       | -                |
| 5 <sup>th</sup> metatarsal: proximal dorso-lateral, peroneal brevis                          | PEA       | 100%*            |
|                                                                                              | ICC       | -                |
| Medial cuneiform: plantar distal-medial, tibialis anterior                                   | PEA       | 100%             |
|                                                                                              | ICC       | 1                |
| Medial cuneiform: plantar distal-lateral, peroneal longus                                    | PEA       | 100%*            |
|                                                                                              | ICC       | -                |
| Medial cuneiform: plantar proximal, tibialis posterior                                       | PEA       | 87%              |
|                                                                                              | ICC       | 0.44             |
| Lateral cuneiform: plantar medial, tibialis posterior                                        | PEA       | 100%             |
|                                                                                              | ICC       | 1                |

|                                               |             |               |
|-----------------------------------------------|-------------|---------------|
| Navicular: plantar medial, tibialis posterior | PEA         | 100%*         |
|                                               | ICC         | -             |
| <b>All sites</b>                              | PEA         | 96% (130/135) |
|                                               | PPA score=0 | 98% (248/253) |
|                                               | PPA score=1 | 71% (12/17)   |
|                                               | ICC         | 0.66          |

Bone marrow lesion=BML; ICC=Intraclass correlation coefficient from generalizability theory; PEA=Percent exact agreement; PPA=Chamberlain's percent positive agreement i.e. the proportion of the total number of ratings made in the two reads which were in agreement. \*All bones scored 0 according to both reads.

**Table S6:** Intra-rater repeatability of scoring for presence of ligament involvement per site.

| Ligament (n=15)      | Statistic   | Ligament 0-1 |
|----------------------|-------------|--------------|
| Lisfranc             | PEA         | 87%          |
|                      | ICC         | 0.74         |
| Intertarsal          | PEA         | 93%          |
|                      | ICC         | 0.65         |
| <b>All ligaments</b> | PEA         | 90% (27/30)  |
|                      | PPA score=0 | 100% (30/30) |
|                      | PPA score=1 | 93% (42/45)  |
|                      | ICC         | 0.77         |

ICC=Intraclass correlation coefficient from generalizability theory; PEA=Percent exact agreement; PPA=Chamberlain's percent positive agreement i.e. the proportion of the total number of ratings made in the two reads which were in agreement.



**Supplementary data 3** Supplementary Tables S7 to S14. Inter-rater reproducibility results per joint, bone and soft tissue location.

**Table S7:** Inter-rater reproducibility of scoring joints for joint space narrowing (JSN), osteophytes, effusion-synovitis and cysts and using suggested cut-points for clinically relevant criteria for JSN and osteophytes (grade  $\geq 2$ ).

| Joint (n=15) | Statistic | JSN 0-3       | JSN $\geq 2$  | Osteophytes 0-3 | Osteophytes $\geq 2$ | Effusion-synovitis 0-1 | Cysts 0-1     |
|--------------|-----------|---------------|---------------|-----------------|----------------------|------------------------|---------------|
| MTPJ1        | PEA       | 54% (7/13)    | 85% (11/13)   | 38% (5/13)      | 92% (12/13)          | 38% (5/13)             | 62% (8/13)    |
|              | ICC       | 0.17          | Negative      | 0.06            | 0.00                 | 0.11                   | 0.19          |
| MTPJ2        | PEA       | 92% (12/13)   | 92% (12/13)   | 92% (12/13)     | 92% (12/13)          | 23% (3/13)             | 92% (12/13)   |
|              | ICC       | 0.00          | 0.00          | 0.00            | 0.00                 | 0.03                   | 0.00          |
| MTPJ3        | PEA       | 100% (13/13)* | 100% (13/13)* | 100% (13/13)*   | 100% (13/13)*        | 23% (3/13)             | 100% (13/13)* |
|              | ICC       | -             | -             | -               | -                    | 0.00                   | -             |
| MTPJ4        | PEA       | 100% (14/14)* | 100% (14/14)* | 100% (14/14)*   | 100% (14/14)*        | 14% (2/14)             | 100% (14/14)* |
|              | ICC       | -             | -             | -               | -                    | 0.00                   | -             |
| MTPJ5        | PEA       | 100% (14/14)* | 100% (14/14)* | 100% (14/14)*   | 100% (14/14)*        | 14% (2/14)             | 93% (13/14)   |
|              | ICC       | -             | -             | -               | -                    | 0.00                   | 0.00          |
| TMTJ1        | PEA       | 87%           | 100%*         | 33%             | 93%                  | 7%                     | 87%           |
|              | ICC       | 0.00          | -             | 0.00            | 0.00                 | 0.00                   | 0.46          |
| TMTJ2        | PEA       | 53%           | 93%           | 53%             | 73%                  | 20%                    | 93%           |
|              | ICC       | 0.66          | 0.83          | 0.49            | 0.46                 | Negative               | 0.83          |

|                            |     |          |       |       |          |          |          |
|----------------------------|-----|----------|-------|-------|----------|----------|----------|
| TMTJ3                      | PEA | 80%      | 100%* | 53%   | 93%      | 27%      | 93%      |
|                            | ICC | 0.00     | -     | 0.00  | 0.00     | Negative | 0.00     |
| TMTJ4                      | PEA | 93%      | 100%* | 40%   | 93%      | 13%      | 93%      |
|                            | ICC | 0.00     | -     | 0.00  | 0.00     | 0.00     | 0.00     |
| TMTJ5                      | PEA | 100%*    | 100%* | 93%   | 100%*    | 20%      | 100%*    |
|                            | ICC | -        | -     | 0.00  | -        | 0.00     | -        |
| Ankle                      | PEA | 80%      | 87%   | 87%   | 100%*    | 40%      | 93%      |
|                            | ICC | 0.00     | 0.00  | 0.00  | -        | 0.13     | 0.00     |
| Subtalar                   | PEA | 93%      | 100%* | 100%* | 100%*    | 0%       | 87%      |
|                            | ICC | 0.00     | -     | -     | -        | 0.00     | 0.00     |
| Talo-navicular             | PEA | 80%      | 100%* | 27%   | 47%      | 20%      | 100%     |
|                            | ICC | Negative | -     | 0.11  | 0.05     | 0.02     | 1        |
| Calc-cuboid                | PEA | 87%      | 100%* | 53%   | 80%      | 33%      | 87%      |
|                            | ICC | 0.00     | -     | 0.00  | 0.00     | 0.05     | Negative |
| Nav-medial-cuneiform       | PEA | 87%      | 100%* | 60%   | 87%      | 47%      | 87%      |
|                            | ICC | 0.00     | -     | 0.20  | Negative | 0.10     | 0.61     |
| Nav-intermediate-cuneiform | PEA | 80%      | 93%   | 73%   | 93%      | 60%      | 100%     |
|                            | ICC | 0.53     | 0.00  | 0.70  | 0.65     | 0.00     | 1        |
| Nav-lateral-cuneiform      | PEA | 100%     | 100%* | 100%  | 100%*    | 67%      | 93%      |

|                   |                |               |               |               |               |               |               |
|-------------------|----------------|---------------|---------------|---------------|---------------|---------------|---------------|
|                   | ICC            | 1             | -             | 1             | -             | 0.00          | 0.00          |
| <b>All joints</b> | PEA            | 86% (213/247) | 97% (240/247) | 70% (174/247) | 91% (224/247) | 28% (68/247)  | 92% (227/247) |
|                   | % ± 1 category | 98% (242/247) | n/a           | 93% (230/247) | n/a           | n/a           | n/a           |
|                   | PPA score=0    | 93% (418/448) | 99% (474/481) | 83% (330/397) | 95% (436/459) | 38% (112/291) | 96% (432/452) |
|                   | PPA score=1    | 12% (4/33)    | 46% (6/13)    | 10% (6/62)    | 34% (12/35)   | 12% (24/203)  | 52% (22/42)   |
|                   | PPA score=2    | 36% (4/11)    | n/a           | 34% (12/35)   | n/a           | n/a           | n/a           |
|                   | PPA score=3    | 0% (0/2)      | n/a           | -             | n/a           | n/a           | n/a           |
|                   | ICC            | 0.43          | 0.44          | 0.27          | 0.29          | 0.02          | 0.48          |

Metatarsophalangeal joint=MTPJ; Tarsometatarsal joint=TMTJ; Joint space narrowing=JSN; ICC=Intraclass correlation coefficient from generalizability theory; PEA=Percent exact agreement; PPA=Chamberlain’s percent positive agreement i.e. the proportion of the total number of ratings made in the two reads which were in agreement. \*All joints scored 0 according to both reads.

**Table S8:** Inter-rater reproducibility of scoring bones for erosion and bone marrow lesion (BML) and using suggested cut-points for clinically relevant criteria (grade  $\geq 1$ ).

| Bone (n=15)           | Statistic | Erosion 0-3   | Erosion $\geq 1$ | BML 0-3       | BML $\geq 1$  |
|-----------------------|-----------|---------------|------------------|---------------|---------------|
| Distal metatarsal 1   | PEA       | 77% (10/13)   | 77% (10/13)      | 69% (9/13)    | 69% (9/13)    |
|                       | ICC       | 0.00          | 0.00             | 0.17          | 0.17          |
| Distal metatarsal 2   | PEA       | 92% (12/13)   | 92% (12/13)      | 100% (13/13)  | 100% (13/13)  |
|                       | ICC       | 0.00          | 0.00             | 1             | 1             |
| Distal metatarsal 3   | PEA       | 100% (14/14)* | 100% (14/14)*    | 100% (13/13)* | 100% (13/13)* |
|                       | ICC       | -             | -                | -             | -             |
| Distal metatarsal 4   | PEA       | 100% (14/14)* | 100% (14/14)*    | 100% (14/14)* | 100% (14/14)* |
|                       | ICC       | -             | -                | -             | -             |
| Distal metatarsal 5   | PEA       | 100% (14/14)* | 100% (14/14)*    | 100% (14/14)* | 100% (14/14)* |
|                       | ICC       | -             | -                | -             | -             |
| Proximal metatarsal 1 | PEA       | 93%           | 93%              | 80%           | 80%           |
|                       | ICC       | 0.00          | 0.00             | 0.73          | 0.49          |
| Proximal metatarsal 2 | PEA       | 80%           | 80%              | 73%           | 93%           |
|                       | ICC       | 0.00          | 0.00             | 0.47          | 0.88          |
| Proximal metatarsal 3 | PEA       | 93%           | 93%              | 67%           | 73%           |

|                        |     |       |       |       |       |
|------------------------|-----|-------|-------|-------|-------|
|                        | ICC | 0.00  | 0.00  | 0.50  | 0.83  |
| Proximal metatarsal 4  | PEA | 100%* | 100%* | 80%   | 87%   |
|                        | ICC | -     | -     | 0.61  | 0.60  |
| Proximal metatarsal 5  | PEA | 100%* | 100%* | 100%* | 100%* |
|                        | ICC | -     | -     | -     | -     |
| Talus                  | PEA | 93%   | 93%   | 87%   | 93%   |
|                        | ICC | 0.00  | 0.00  | 0.72  | 0.77  |
| Calcaneus              | PEA | 100%* | 100%* | 93%   | 93%   |
|                        | ICC | -     | -     | 0.65  | 0.65  |
| Navicular              | PEA | 100%* | 100%* | 87%   | 93%   |
|                        | ICC | -     | -     | 0.88  | 0.87  |
| Medial cuneiform       | PEA | 100%* | 100%* | 93%   | 93%   |
|                        | ICC | -     | -     | 0.95  | 0.87  |
| Intermediate cuneiform | PEA | 87%   | 87%   | 60%   | 87%   |
|                        | ICC | 0.00  | 0.00  | 0.71  | 0.74  |
| Lateral cuneiform      | PEA | 100%* | 100%* | 67%   | 73%   |
|                        | ICC | -     | -     | 0.41  | 0.26  |
| Cuboid                 | PEA | 100%* | 100%* | 53%   | 53%   |
|                        | ICC | -     | -     | 0.00  | 0.00  |

|                  |                |                |               |                |               |
|------------------|----------------|----------------|---------------|----------------|---------------|
| <b>All bones</b> | PEA            | 95% (236/248)  | 95% (236/248) | 83% (204/247)  | 87% (216/247) |
|                  | % ± 1 category | >99% (247/248) | n/a           | >99% (245/247) | n/a           |
|                  | PPA score=0    | 98% (472/484)  | 98% (472/484) | 92% (348/379)  | 92% (348/379) |
|                  | PPA score=1    | 0% (0/11)      | 0% (0/12)     | 49% (40/81)    | 73% (84/115)  |
|                  | PPA score=2    | 0% (0/1)       | n/a           | 61% (20/33)    | n/a           |
|                  | PPA score=3    | -              | n/a           | 0% (0/1)       | n/a           |
|                  | ICC            | 0.00           | 0.00          | 0.68           | 0.64          |

Bone marrow lesion=BML; ICC=Intraclass correlation coefficient from generalizability theory; PEA=Percent exact agreement; PPA=Chamberlain's percent positive agreement i.e. the proportion of the total number of ratings made in the two reads which were in agreement. \*All bones scored 0 according to both reads.

**Table S9:** Inter-rater reproducibility of scoring of tenosynovitis per tendon per grade and with suggested cut-points for clinically relevant criteria  $\geq 2$ .

| <b>Tendon (n=15)</b>      | <b>Statistic</b>   | <b>Tenosynovitis 0-3</b> | <b>Tenosynovitis <math>\geq 2</math></b> |
|---------------------------|--------------------|--------------------------|------------------------------------------|
| Tibialis anterior         | PEA                | 47%                      | 93%                                      |
|                           | ICC                | 0.24                     | 0.00                                     |
| Extensor hallucis longus  | PEA                | 93%                      | 100%*                                    |
|                           | ICC                | 0.00                     | -                                        |
| Extensor digitorum longus | PEA                | 80%                      | 87%                                      |
|                           | ICC                | Negative                 | Negative                                 |
| Peroneus brevis           | PEA                | 73%                      | 93%                                      |
|                           | ICC                | 0.44                     | 0.00                                     |
| Peroneus longus           | PEA                | 47%                      | 87%                                      |
|                           | ICC                | 0.32                     | 0.44                                     |
| Tibialis posterior        | PEA                | 47%                      | 93%                                      |
|                           | ICC                | 0.50                     | 0.65                                     |
| Flexor hallucis longus    | PEA                | 73%                      | 87%                                      |
|                           | ICC                | 0.56                     | 0.44                                     |
| Flexor digitorum longus   | PEA                | 73%                      | 87%                                      |
|                           | ICC                | 0.61                     | 0.47                                     |
| <b>All tendons</b>        | PEA                | 67% (80/120)             | 91% (109/120)                            |
|                           | % $\pm 1$ category | 97% (116/120)            | n/a                                      |
|                           | PPA score=0        | 81% (142/175)            | 95% (212/223)                            |
|                           | PPA score=1        | 25% (12/48)              | 35% (6/17)                               |
|                           | PPA score=2        | 35% (6/17)               | n/a                                      |
|                           | PPA score=3        | -                        | n/a                                      |
|                           | ICC                | 0.35                     | 0.23                                     |

ICC=Intraclass correlation coefficient from generalizability theory; PEA=Percent exact agreement; PPA=Chamberlain's percent positive agreement i.e. the proportion of the total number of ratings made in the two reads which were in agreement. \*All tendons scored 0 according to both reads.

**Table S10:** Inter-rater reproducibility of scoring presence of bone lesion at five sub-tendon bone marrow lesion (BML) locations.

| Site (n=15)                          | Statistic   | Sub Tendon BML 0-1 |
|--------------------------------------|-------------|--------------------|
| Medial calcaneal: tibialis posterior | PEA         | 100%*              |
|                                      | ICC         | -                  |
| Lateral calcaneal: peroneus longus   | PEA         | 87%                |
|                                      | ICC         | 0.00               |
| Navicular: tibialis posterior        | PEA         | 93%                |
|                                      | ICC         | 0.65               |
| Medial cuneiform: tibialis anterior  | PEA         | 80%                |
|                                      | ICC         | Negative           |
| Cuboid: peroneus longus              | PEA         | 53%                |
|                                      | ICC         | Negative           |
| <b>All sites</b>                     | PEA         | 83% (62/75)        |
|                                      | PPA score=0 | 90% (122/135)      |
|                                      | PPA score=1 | 13% (2/15)         |
|                                      | ICC         | 0.13               |

Bone marrow lesion=BML; ICC=Intraclass correlation coefficient from generalizability theory; PEA=Percent exact agreement; PPA=Chamberlain's percent positive agreement i.e. the proportion of the total number of ratings made in the two reads which were in agreement. \*All bones scored 0 according to both reads.



**Table S11:** Inter-rater reproducibility of scoring presence of bone marrow lesion (BML) associated with tendon entheses (present =1 absent =0).

| Site (n=15)                                                                                  | Statistic   | Enthesis BML 0-1 |
|----------------------------------------------------------------------------------------------|-------------|------------------|
| 1 <sup>st</sup> metatarsal: plantar medial, tibialis anterior                                | PEA         | 100%             |
|                                                                                              | ICC         | 1                |
| 1 <sup>st</sup> metatarsal: plantar lateral, peroneal longus                                 | PEA         | 80%              |
|                                                                                              | ICC         | 0.46             |
| 2 <sup>nd</sup> , 3 <sup>rd</sup> or 4 <sup>th</sup> metatarsal: plantar, tibialis posterior | PEA         | 93%              |
|                                                                                              | ICC         | 0.00             |
| 5 <sup>th</sup> metatarsal: proximal dorso-lateral, peroneal brevis                          | PEA         | 100%*            |
|                                                                                              | ICC         | -                |
| Medial cuneiform: plantar distal-medial, tibialis anterior                                   | PEA         | 93%              |
|                                                                                              | ICC         | 0.00             |
| Medial cuneiform: plantar distal-lateral, peroneal longus                                    | PEA         | 87%              |
|                                                                                              | ICC         | 0.00             |
| Medial cuneiform: plantar proximal, tibialis posterior                                       | PEA         | 73%              |
|                                                                                              | ICC         | 0.20             |
| Lateral cuneiform: plantar medial, tibialis posterior                                        | PEA         | 93%              |
|                                                                                              | ICC         | 0.00             |
| Navicular: plantar medial, tibialis posterior                                                | PEA         | 100%*            |
|                                                                                              | ICC         | -                |
| <b>All sites</b>                                                                             | PEA         | 91% (123/135)    |
|                                                                                              | PPA score=0 | 95% (238/250)    |
|                                                                                              | PPA score=1 | 40% (8/20)       |
|                                                                                              | ICC         | 0.34             |

Bone marrow lesion=BML; ICC=Intraclass correlation coefficient from generalizability theory; PEA=Percent exact agreement; PPA=Chamberlain's percent positive agreement i.e. the proportion of the total number of ratings made in the two reads which were in agreement. \*All bones scored 0 according to both reads.

**Table S12:** Inter-rater reproducibility of scoring for presence of ligament involvement per site (present =1 absent =0).

| Ligament (n=15)      | Statistic   | Ligament 0-1 |
|----------------------|-------------|--------------|
| Lisfranc             | PEA         | 60%          |
|                      | ICC         | 0.18         |
| Intertarsal          | PEA         | 87%          |
|                      | ICC         | 0.00         |
| <b>All ligaments</b> | PEA         | 73% (22/30)  |
|                      | PPA score=0 | 83% (38/46)  |
|                      | PPA score=1 | 43% (6/14)   |
|                      | ICC         | 0.33         |

ICC=Intraclass correlation coefficient from generalizability theory; PEA=Percent exact agreement; PPA=Chamberlain's percent positive agreement i.e. the proportion of the total number of ratings made in the two reads which were in agreement.
